# Supplementary material for: Speciation analysis of both inorganic and organic 129I in seawater and its application in the study of the marine iodine cycle
Source: Royal Society of Chemistry journal article supplement (doi:10.1039/d2ay00813k), 2022-01-01
Supplement: d2ay00813k1.pdf [file d2ay00813k1.pdf]

## Supplementary Information

### **Speciation analysis of both inorganic and organic $^{129}\text{I}$ in seawater and its application in the study of marine iodine cycle**

Yuanzhi Qi<sup>1\*</sup>, Hiroyuki Matsuzaki<sup>1,2</sup>

<sup>1</sup>Department of Nuclear Engineering and Management, The University of Tokyo, 7-3-1 Hongo, Bunkyo City, Tokyo, 113-8654, JAPAN

<sup>2</sup>Micro Analysis Laboratory, Tandem accelerator, The University Museum, The University of Tokyo, 2-11-16 Yayoi, Bunkyo-ku, Tokyo 113-0032, JAPAN

\*Correspondence to: Yuanzhi Qi, [qiyuanzhi93@gmail.com](mailto:qiyuanzhi93@gmail.com)

A complete protocol is presented for the speciation analysis of  $^{129}\text{I}$  for both inorganic and organic iodine in seawater using coprecipitation and solid-phase extraction (SPE) combined with accelerator mass spectrometry (AMS). The coprecipitation method for inorganic  $^{129}\text{I}$  analysis used in this study was modified based on Luo et al.<sup>1</sup> and Xing et al.<sup>2</sup>, while the SPE-DO $^{129}\text{I}$  method was developed according to a SPE dissolved organic matter (DOM) analytical method<sup>3-5</sup>. It is worth mentioning that during the oxidation of dissolved organic iodine (DOI) using  $\text{K}_2\text{S}_2\text{O}_8$ <sup>6</sup>, iodide and DOI in solution undergoes an intermediate stage in the form of  $\text{I}_2$  and is then oxidized to iodate, and  $\text{Cl}^-$  will also be oxidized to  $\text{Cl}_2$ . Under the acidic experiment environment, the solubility of  $\text{Cl}_2$  is very low, and the release of gaseous  $\text{Cl}_2$  from the solution to the air will carry a certain amount of  $\text{I}_2$  to cause the loss of iodine. Therefore, to avoid the loss of iodine, a sealed environment is necessary during the oxidation process, and after the oxidation, the inner wall of the headspace part of the container should be fully infiltrated by shaking the solution to ensure that the escaped  $\text{I}_2$  is redissolved into the liquid sample. The detailed experimental procedures are shown as follows:

1. Separation of iodide ( $\text{I}^-$ ) from seawater by coprecipitation
  - a. Transfer seawater sample (0.5 ~ 2 L) to a beaker, and add 0.6 mg or 1.0 mg of  $^{127}\text{I}^-$  carrier.
  - b. Add  $\text{AgNO}_3$  (0.03 mol/L, up to the  $\text{Ag}^+$  as 100 mg/L) slowly under stirring to coprecipitate iodide as  $\text{AgI}$  with  $\text{AgCl}$  and  $\text{AgBr}$ .
  - c. Stir for 45 min.
  - d. Settle the precipitate with seawater overnight in the dark, followed by decanting of the supernatant and centrifuging of the remaining slurry.
  - e. Wash the slurry with 3 ml 3 mol/L  $\text{HNO}_3$ , 10 ml of Milli-Q water, 10 ml of 10%  $\text{NH}_4\text{OH}$ , and 10 ml of Milli-Q water step by step. After each washing step, a centrifugation process (3000 rpm for 10 min) is adopted to separate the precipitate and supernatant.
  - f. Dry the precipitate at 70 °C for 24 h, ground, add Nb powder with the  $\text{AgI}:\text{Nb}$  mass ratio of 1:4, and finally press them into the aluminum holder for AMS measurement.
2. Removal of remaining iodide from seawater by coprecipitation (Reduce the cross-contamination)
  - a. Transfer the supernatant obtained from the previous step to a beaker, and add 2.0 mol/L  $\text{Na}_2\text{SO}_3$  to the concentration of 0.3 mM.
  - b. Adjust the pH of seawater to about 4.0 by  $\text{HNO}_3$  (0.5 mol/L).
  - c. Add  $\text{AgNO}_3$  (0.03 mol/L, up to the  $\text{Ag}^+$  as 100 mg/L) slowly under stirring to coprecipitate

iodide as AgI with AgCl, AgBr, and Ag<sub>2</sub>SO<sub>3</sub>.

- d. Stir for 45 min.
  - e. Settle the precipitate with seawater overnight in the dark, followed by decanting of the supernatant.
3. Separation of iodate (IO<sub>3</sub><sup>-</sup>) from seawater by coprecipitation
- a. Transfer the supernatant obtained from the previous step to a beaker, add 0.5 mL of 2.0 mol/L Na<sub>2</sub>SO<sub>3</sub> and add 0.6 or 1.0 mg <sup>127</sup>I<sup>-</sup> carrier.
  - b. Adjust the pH of seawater to about 1~2 by HNO<sub>3</sub> (60%) to accelerate the reduction of iodate to iodide.
  - c. Add AgNO<sub>3</sub> (0.03 mol/L, up to the Ag<sup>+</sup> as 100 mg/L) slowly added under stirring to coprecipitate iodide as AgI with AgCl, AgBr, and Ag<sub>2</sub>SO<sub>3</sub>.
  - d. Stir for 45 min.
  - e. Settle the precipitate with seawater overnight in the dark, followed by decanting of the supernatant and centrifuging of the remaining slurry.
  - f. Wash the slurry with 3 ml 3 mol/L HNO<sub>3</sub>, 10 ml of Milli-Q water, 10 ml of 10% NH<sub>4</sub>OH, and 10 ml of Milli-Q water step by step. After each washing step, a centrifugation process (3000 rpm for 10 min) is adopted to separate the precipitate and supernatant.
  - g. Dry the precipitate at 70 °C for 24 h, ground, add Nb powder with the AgI:Nb mass ratio of 1:4, and finally press them into the aluminum holder for AMS measurement.
4. Separation of total inorganic iodine (TII) from seawater
- The treatment procedure for total inorganic iodine is the same as for iodate.
5. Separation of total iodine (TI) from seawater
- a. Transfer seawater sample (0.2 ~ 0.6 L) to a container, and add 0.6 mg of <sup>127</sup>I<sup>-</sup> carrier.
  - b. Add K<sub>2</sub>S<sub>2</sub>O<sub>8</sub> to the sample to the concentration of 10 mg/g of seawater.
  - c. Adjust the pH of seawater to about 1~2 by HNO<sub>3</sub> (60%).
  - d. Seal the sample container.
  - e. Incubate the sample at 60 °C for 20 h.
  - f. Shake the sample to fully infiltrate the inner wall of the headspace part of the container.
  - g. Add Na<sub>2</sub>SO<sub>3</sub> to the Na<sub>2</sub>SO<sub>3</sub>:K<sub>2</sub>S<sub>2</sub>O<sub>8</sub> mass ratio higher than 1:2.
  - h. The following steps are the same as the steps b ~ g of the separation of iodate from seawater.
6. Separation of dissolved organic iodine (DOI) from seawater

- Isolate DOI by the PPL SPE-DOI method developed in this study.
- Transfer an appropriate amount of aqueous DOI isolate to a glass centrifuge tube.
- The following steps are the same as the steps b ~ h of the separation of total iodine from seawater.

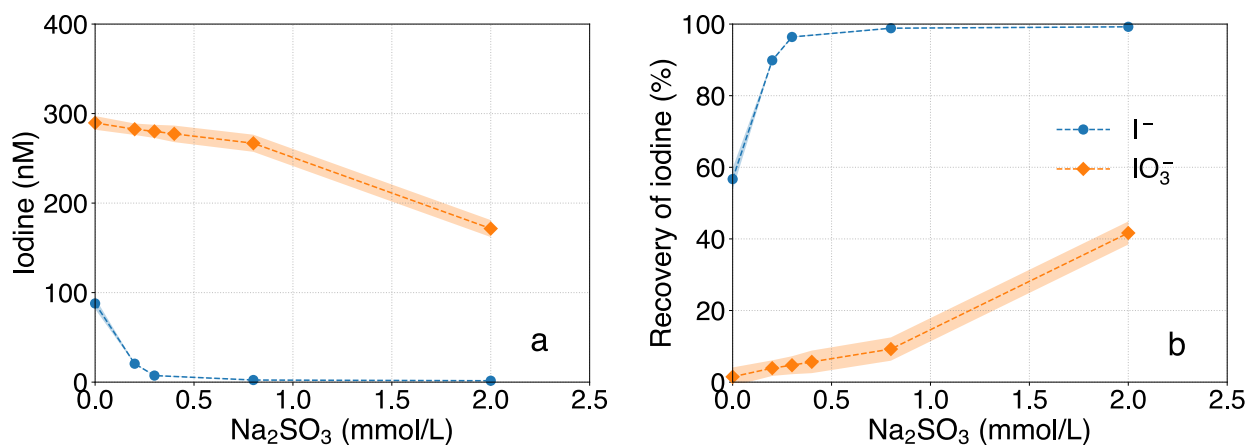

Figure S1. Influence of the  $\text{Na}_2\text{SO}_3$  concentration on coprecipitation of iodine. (a) Iodine concentration in the supernatant and (b) calculated recovery of iodine in the precipitate. Experiment condition: ASW with pH ~ 5.0; 100 mg  $\text{Ag}^+$  per liter of seawater. The x-axis represents

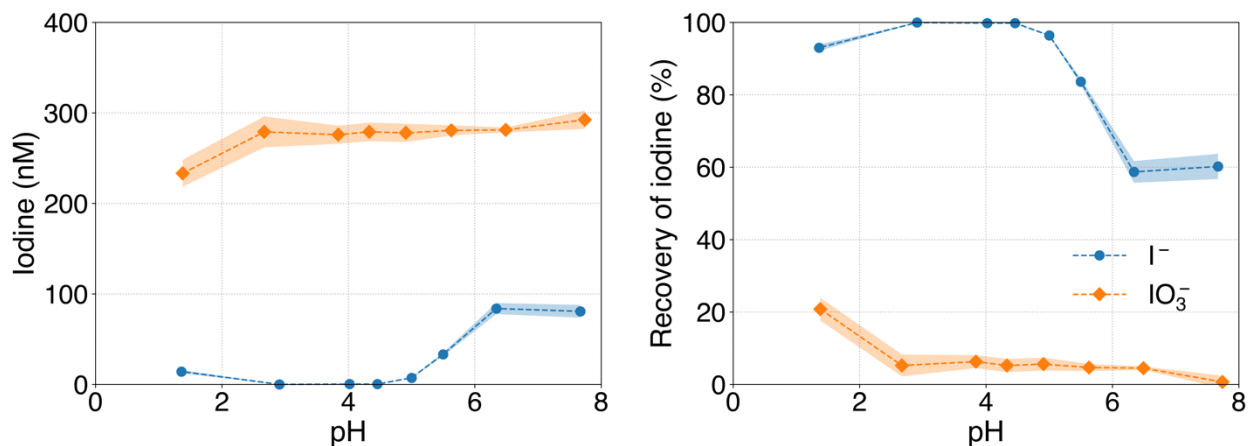

Figure S2. Influence of the pH on coprecipitation of iodine. (a) Iodine concentration in the supernatant and (b) calculated recovery of iodine in the precipitate. Experiment condition: 100 mg  $\text{Ag}^+$  per liter of seawater; 0.3 mmol/L  $\text{Na}_2\text{SO}_3$ . The shaded areas show the  $1\sigma$  interval of variation curves based on the triple measurement of iodine in the supernatant.

Table S1. Iodine speciation results of surface seawater in the Tokyo Bay

| Station | TI<br>(nM)  | T <sup>129</sup> I<br>(× 10 <sup>7</sup> atoms/L) | T <sup>129</sup> I/T <sup>127</sup> I<br>(× 10 <sup>-12</sup> ) | TII<br>(nM)  | TI <sup>129</sup> I<br>(× 10 <sup>7</sup> atoms/L) | TI <sup>129</sup> I/TI <sup>127</sup> I<br>(× 10 <sup>-12</sup> ) |
|---------|-------------|---------------------------------------------------|-----------------------------------------------------------------|--------------|----------------------------------------------------|-------------------------------------------------------------------|
| St.61   | 400.6 ± 2.6 | 2.21 ± 0.07                                       | 92 ± 3                                                          | 389.3 ± 2.6* | 2.00 ± 0.09*                                       | 85 ± 4*                                                           |
| St.J    | 387.8 ± 2.1 | 2.43 ± 0.08                                       | 104 ± 3                                                         | 366.5 ± 2.2* | 2.28 ± 0.09*                                       | 103 ± 4*                                                          |
| TB09    | 400.3 ± 2.6 | 2.12 ± 0.08                                       | 88 ± 3                                                          | 381.0 ± 2.6* | 1.95 ± 0.10*                                       | 85 ± 4*                                                           |
| TB13    | 360.7 ± 3.0 | 2.29 ± 0.08                                       | 105 ± 4                                                         | 311.1 ± 3.2* | 2.10 ± 0.08*                                       | 112 ± 4*                                                          |

Table S1. Continued

| Station | I <sup>-</sup><br>(nM) | <sup>129</sup> I <sup>-</sup><br>(× 10 <sup>7</sup> atoms/L) | <sup>129</sup> I <sup>-</sup> / <sup>127</sup> I <sup>-</sup><br>(× 10 <sup>-12</sup> ) | IO <sub>3</sub> <sup>-</sup><br>(nM) | <sup>129</sup> IO <sub>3</sub> <sup>-</sup><br>(× 10 <sup>7</sup> atoms/L) | <sup>129</sup> IO <sub>3</sub> <sup>-</sup> / <sup>127</sup> IO <sub>3</sub> <sup>-</sup><br>(× 10 <sup>-12</sup> ) |
|---------|------------------------|--------------------------------------------------------------|-----------------------------------------------------------------------------------------|--------------------------------------|----------------------------------------------------------------------------|---------------------------------------------------------------------------------------------------------------------|
| St.61   | 188.6 ± 1.9            | 1.33 ± 0.03                                                  | 117 ± 2                                                                                 | 200.6 ± 3.2*                         | 0.72 ± 0.02*                                                               | 60 ± 1*                                                                                                             |
| St.J    | 178.1 ± 1.9            | 1.46 ± 0.08                                                  | 136 ± 7                                                                                 | 188.4 ± 2.9*                         | 0.68 ± 0.03*                                                               | 60 ± 3*                                                                                                             |
| TB09    | 191.0 ± 1.8            | 1.38 ± 0.03                                                  | 120 ± 3                                                                                 | 190.0 ± 3.2*                         | 0.60 ± 0.03*                                                               | 52 ± 2*                                                                                                             |
| TB13    | 146.2 ± 2.4            | 1.36 ± 0.04                                                  | 154 ± 4                                                                                 | 164.9 ± 4.0*                         | 0.60 ± 0.03*                                                               | 60 ± 2*                                                                                                             |

Table S1. Continued

| Station | SPE-DOI<br>(nM) | SPE-DO <sup>129</sup> I<br>(× 10 <sup>5</sup> atoms/L) | SPE-DO <sup>129</sup> I/DO <sup>127</sup> I<br>(× 10 <sup>-12</sup> ) | TI <sup>129</sup> I + DO <sup>129</sup> I/0.6<br>(× 10 <sup>7</sup> atoms/L) | <sup>129</sup> I <sup>-</sup> + <sup>129</sup> IO <sub>3</sub> <sup>-</sup><br>(× 10 <sup>7</sup> atoms/L) |
|---------|-----------------|--------------------------------------------------------|-----------------------------------------------------------------------|------------------------------------------------------------------------------|------------------------------------------------------------------------------------------------------------|
| St.61   | 6.8 ± 0.4       | 4.13 ± 0.32                                            | 101 ± 5                                                               | 2.07 ± 0.09                                                                  | 2.06 ± 0.03                                                                                                |
|         | 7.1 ± 0.3       | 4.07 ± 0.26                                            | 96 ± 4                                                                |                                                                              |                                                                                                            |
| St.J    | 7.7 ± 0.4       | 5.19 ± 0.35                                            | 113 ± 4                                                               | 2.36 ± 0.09                                                                  | 2.14 ± 0.08                                                                                                |
|         | 8.2 ± 0.4       | 5.24 ± 0.39                                            | 106 ± 6                                                               |                                                                              |                                                                                                            |
| TB09    | 6.9 ± 0.4       | 4.80 ± 0.30                                            | 115 ± 6                                                               | 2.03 ± 0.10                                                                  | 1.98 ± 0.04                                                                                                |
| TB13    | 17.9 ± 0.9      | 9.53 ± 0.49                                            | 89 ± 4                                                                | 2.26 ± 0.08                                                                  | 1.96 ± 0.05                                                                                                |

\* represents the evaluated value based on assuming the extraction efficiency of PPL SPE to be 60%

## References

- 1 M. Luo, X. Hou, C. He, Q. Liu and Y. Fan, *Anal. Chem.*, 2013, **85**, 3715–3722.
- 2 S. Xing, X. Hou, A. Aldahan and G. Possnert, *J. Radioanal. Nucl. Chem.*, 2017, **311**, 833–841.
- 3 Y. Qi, W. Fu, J. Tian, C. Luo, S. Shan, S. Sun, P. Ren, H. Zhang, J. Liu, X. Zhang and X. Wang, *Nat. Commun.*, 2020, **11**, 1–11.
- 4 C. Xu, Y. Xue, Y. Qi and X. Wang, *Estuaries and Coasts*, 2016, **39**, 1617–1625.
- 5 T. Dittmar, B. Koch, N. Hertkorn and G. Kattner, *Limnol. Oceanogr. Methods*, 2008, **6**, 230–235.
- 6 H. Dang, X. Hou, P. Roos and S. P. Nielsen, *Anal. METHODS*, 2013, **5**, 449–456.
